# Supplementary material
Source: publisher figshare collection journal article supplement (https://diabetesjournals.figshare.com/articles/dataset/_/19323818)
Supplement: Supplementary file 1 [file 1]

## Methods and Legend for Supplementary Data Table 1:

### Method:

We used the Slicer Dicer Tool inside Epic Cosmos™, a federated database similar to TriNetX™, but with a greater number of medical records (107.6 million) distributed geographically similar to those of the TriNetX database. Identical search terms and temporal flows were used in these searches as described for the TriNetX database searches.

### Table Summary:

The incidence of T1D in subject at 1-6 months from a SARS CoV-2 PCR test among the range of BMI <18, between 18.5 – less than 25, and between 25-30, even when stratified by age (<5 years, 5- less than 18 years, and 18-30 years) is not greater than the known incidence of T1D in non-COVID individuals for the period March 1 2020 – July 15 2021.

- A. The incidence of T1D in subjects at 1-6 months from a SARS CoV-2 PCR test, for the period March 1 2020 – July 15 2021, among the range of BMI <18, between 18.5 – less than 25, and between 25-30 and stratified by age (<5 years, 5- less than 18 years, and 18-30 years).
- B. The incidence of T1D in non-COVID individuals, for the period March 1 2020 – July 15 2021, among the range of BMI <18, between 18.5 – less than 25, and between 25-30 and stratified by age (<5 years, 5- less than 18 years, and 18-30 years).
- C. The incidence of T1D in non-COVID individuals, for the period January 1, 2019 – January 1, 2020, among the range of BMI <18, between 18.5 – less than 25, and between 25-30 and stratified by age (<5 years, 5- less than 18 years, and 18-30 years).
- D. The incidence of T1D in non-COVID individuals, for the period January 1, 2018 – January 1, 2019, among the range of BMI <18, between 18.5 – less than 25, and between 25-30 and stratified by age (<5 years, 5- less than 18 years, and 18-30 years).
