# Supplementary material
Source: publisher figshare collection journal article supplement (https://diabetesjournals.figshare.com/articles/dataset/_/19323818)
Supplement: Supplementary file 2 [file 1]

**Supplementary Data Table 1:** Comparison of previous year T1D incidence stratified by age range and BMI range

| Age range | BMI range | Incidence<br>(in SARS CoV-2 positive)<br>March 1, 2020-July 15 2021 | Incidence<br>(in SARS CoV-2 negative)<br>March 1, 2020-July 15 2021 | Incidence<br>January 1, 2019-<br>December 31, 2020 | Incidence<br>January 1, 2018-<br>December 31, 2019 |
|-----------|-----------|---------------------------------------------------------------------|---------------------------------------------------------------------|----------------------------------------------------|----------------------------------------------------|
|           |           | <b>Base population</b>                                              |                                                                     | <b>Base population</b>                             |                                                    |
|           |           | <b>1,690,453</b>                                                    | <b>9,796,966</b>                                                    | <b>107,594,660</b>                                 |                                                    |
|           |           |                                                                     |                                                                     |                                                    |                                                    |
| <5        | <18.5     | <10                                                                 | 392                                                                 | 130                                                | 45                                                 |
|           | 18.5-25.0 | <10                                                                 | 58                                                                  | 33                                                 | <10                                                |
|           | 25.0-30   | <10                                                                 | <10                                                                 | <10                                                | <10                                                |
|           | >30.0     | <10                                                                 | <10                                                                 | <10                                                | <10                                                |
|           |           |                                                                     |                                                                     |                                                    |                                                    |
| 5-18      | <18.5     | 14                                                                  | 2784                                                                | 2246                                               | 2323                                               |
|           | 18.5-25.0 | 27                                                                  | 2375                                                                | 1660                                               | 1417                                               |
|           | 25.0-30.0 | <10                                                                 | 784                                                                 | 400                                                | 321                                                |
|           | >30.0     | <10                                                                 | 495                                                                 | 196                                                | 133                                                |
|           |           |                                                                     |                                                                     |                                                    |                                                    |
| 18-30     | <18.5     | 12                                                                  | 686                                                                 | 566                                                | 528                                                |
|           | 18.5-25.0 | 68                                                                  | 3989                                                                | 3481                                               | 3673                                               |
|           | 25.0-30.  | 30                                                                  | 2299                                                                | 1966                                               | 1952                                               |
|           | >30.0     | 26                                                                  | 1771                                                                | 1324                                               | 1217                                               |
|           |           |                                                                     |                                                                     |                                                    |                                                    |
|           |           |                                                                     |                                                                     |                                                    |                                                    |
