# Supplementary material
Source: publisher figshare collection journal article supplement (https://diabetesjournals.figshare.com/articles/dataset/_/19323818)
Supplement: Supplementary file 3 [file 2]

**Supplementary Data Table 1:** Comparison of T1D incidence in the 0-30 years age range inside the 13.5 month period of the pandemic height (March 2020-July 2021) compared to the incidence in the two previous calendar years. In all base populations, EMRs with T2D confirmed in the medical record were excluded from the analyses.

| <b>Incidence<br/>(in SARS CoV-2 positive)</b> | <b>Incidence<br/>(in SARS CoV-2 negative)</b> | <b>Incidence</b>                      | <b>Incidence</b>                      |
|-----------------------------------------------|-----------------------------------------------|---------------------------------------|---------------------------------------|
| March 1, 2020-July 15 2021                    | March 1, 2020-July 15 2021                    | January 1, 2019-<br>December 31, 2020 | January 1, 2018-<br>December 31, 2019 |
| <b>Base population</b>                        |                                               | <b>Base population</b>                |                                       |
| <b>3,299,381</b>                              | <b>49,670,552</b>                             | <b>49,663,151</b>                     | <b>49,679,066</b>                     |
|                                               |                                               |                                       |                                       |
| 233                                           | 21692                                         | 26806                                 | 27704                                 |
|                                               |                                               |                                       |                                       |
