# Supplementary material
Source: publisher figshare collection journal article supplement (https://diabetesjournals.figshare.com/articles/dataset/_/19323818)
Supplement: Supplementary file 4 [file 2]

## Methods and Legend for Supplementary Data Table 1:

### Method:

We used the Slicer Dicer Tool inside Epic Cosmos™, a federated database similar to TriNetX™, but with a greater number of medical records (> 139 million) distributed geographically similar to those of the TriNetX database. Identical search terms and temporal flows were used in these searches as described for the TriNetX database searches.

### Table Summary:

The incidence of T1D at 1-6 months from a confirmed-positive SARS CoV-2 PCR test in non-T2D subjects in the 0-30 year old age range for the period March 1 2020 – July 15 2021 is not greater than the incidence of T1D in non-COVID, non-T2D individuals for the periods January 1, 2019 – January 1 2020, and January 1, 2018 – January 1, 2019.
